# Supplementary material
Source: PubMed Central journal article supplement (PMC9926932)
Supplement: NIHMS1871599-supplement-Suppl__Table_1.pdf [file NIHMS1871599-supplement-Suppl__Table_1.pdf]

**SUPPLEMENTAL TABLE I: Differential Phosphorylation of Target Proteins in Cardiac Myocytes Isolated from Wild Type Versus Prkg1<sup>RQ/+</sup> Mice.** Phosphoproteomic analysis was performed as described in Methods. Data in the columns labeled RQ/+ and WT represent the mean area of the peaks in the ion chromatograms normalized to the peak areas of the corresponding peaks of the unphosphorylated peptides (means of cells from n=4 mice per genotype).

| Protein Accession | Protein Name                       | Phosphosite (s) | RQ/+    | WT     | Log2 WT/RQ/+ | -Log2 p value |
|-------------------|------------------------------------|-----------------|---------|--------|--------------|---------------|
| A2AAJ9            | Obscurin                           | S6503           | 0.7991  | 0.5342 | -0.5811      | 4.9290        |
| A2AMM0            | Muscle-related coiled-coil protein | T334            | 0.3002  | 0.1455 | -1.0446      | 4.7796        |
| A2ASS6            | Titin                              | S12884          | 0.1499  | 0.0438 | -1.7735      | 4.6692        |
|                   |                                    | S12972          | 0.0299  | 0.0075 | -2.0147      | 6.3153        |
|                   |                                    | S13904          | 0.7661  | 0.2754 | -1.4762      | 4.8978        |
|                   |                                    | S1415           | 0.1218  | 0.0181 | -2.7517      | 5.6109        |
|                   |                                    | S17978          | 0.0002  | 0.0004 | 1.2321       | 5.3539        |
|                   |                                    | S18310          | 0.0029  | 0.0012 | -1.3090      | 4.8421        |
|                   |                                    | S18721          | 0.0071  | 0.0017 | -2.1042      | 5.7631        |
|                   |                                    | S19128          | 0.0066  | 0.0019 | -1.8105      | 7.5114        |
|                   |                                    | S20732          | 0.0024  | 0.0007 | -1.8037      | 5.3075        |
|                   |                                    | S21152          | 0.0057  | 0.0014 | -1.9661      | 5.0531        |
|                   |                                    | S214            | 0.0041  | 0.0011 | -1.9085      | 6.2440        |
|                   |                                    | S21858          | 0.0008  | 0.0004 | -1.1779      | 5.0580        |
|                   |                                    | S21980          | 0.0005  | 0.0001 | -2.0856      | 6.3753        |
|                   |                                    | S22390          | 0.0237  | 0.0096 | -1.3004      | 6.1182        |
|                   |                                    | S23358          | 0.0043  | 0.0013 | -1.7008      | 5.9259        |
|                   |                                    | S24287          | 0.0037  | 0.0010 | -1.9079      | 7.7703        |
|                   |                                    | S24415          | 0.0007  | 0.0003 | -1.2021      | 6.6905        |
|                   |                                    | S24436          | 0.0014  | 0.0007 | -1.1276      | 6.3608        |
|                   |                                    | S281            | 0.0006  | 0.0001 | -2.2190      | 4.5485        |
|                   |                                    | S281, S290      | 0.0004  | 0.0001 | -1.7084      | 7.0972        |
|                   |                                    | S29318          | 0.0013  | 0.0005 | -1.3813      | 6.2498        |
|                   |                                    | S315            | 0.1257  | 0.0340 | -1.7007      | 4.5178        |
|                   |                                    | S31837          | 0.0080  | 0.0017 | -2.2325      | 6.0213        |
|                   |                                    | S321            | 0.0036  | 0.0012 | -1.5376      | 4.3341        |
|                   |                                    | S322            | 0.0028  | 0.0010 | -1.4856      | 4.8107        |
|                   |                                    | S32318          | 0.0044  | 0.0016 | -1.4624      | 6.4868        |
|                   |                                    | S32433          | 0.0008  | 0.0002 | -1.6683      | 7.8575        |
| S33086            | 0.0009                             | 0.0004          | -1.3011 | 5.6697 |              |               |
| S33861            | 0.1166                             | 0.0503          | -1.3616 | 4.8831 |              |               |
| S33880            | 0.1259                             | 0.0120          | -3.3897 | 5.5831 |              |               |

|        |       |                   |        |        |         |        |
|--------|-------|-------------------|--------|--------|---------|--------|
| A2ASS6 | Titin | S33927            | 0.0072 | 0.0029 | -1.3157 | 5.3697 |
|        |       | S33928            | 0.0343 | 0.0147 | -1.2170 | 4.7118 |
|        |       | S33933            | 0.1894 | 0.0422 | -1.8482 | 6.5336 |
|        |       | S33961            | 0.0689 | 0.0256 | -1.4254 | 5.1518 |
|        |       | S34009            | 0.0367 | 0.0136 | -1.4275 | 5.1136 |
|        |       | S34065            | 0.2110 | 0.0492 | -2.0442 | 5.9833 |
|        |       | S34097            | 1.8807 | 0.7122 | -1.3743 | 5.4130 |
|        |       | S34097,<br>T34099 | 3.0167 | 0.7140 | -2.0657 | 5.2455 |
|        |       | S34118            | 0.0226 | 0.0095 | -1.2552 | 4.4349 |
|        |       | S34286            | 0.0044 | 0.0017 | -1.3749 | 6.5322 |
|        |       | S34292            | 0.0031 | 0.0009 | -1.8574 | 4.9342 |
|        |       | S34358            | 0.0078 | 0.0013 | -2.5266 | 4.7370 |
|        |       | S34476            | 0.0459 | 0.0152 | -1.9708 | 6.7339 |
|        |       | S35038            | 0.0113 | 0.0048 | -1.2395 | 9.5113 |
|        |       | T15634            | 0.0019 | 0.0008 | -1.3113 | 5.6776 |
|        |       | T16928            | 0.0015 | 0.0006 | -1.1773 | 6.2643 |
|        |       | T17096            | 0.0029 | 0.0012 | -1.3013 | 5.6016 |
|        |       | T18267            | 0.0009 | 0.0004 | -1.2666 | 5.2523 |
|        |       | T20730            | 0.0013 | 0.0006 | -1.1194 | 5.2102 |
|        |       | T20974            | 0.0012 | 0.0005 | -1.3938 | 5.9147 |
|        |       | T21339            | 0.0006 | 0.0002 | -1.3134 | 5.1288 |
|        |       | T21345            | 0.0043 | 0.0014 | -1.6002 | 5.7396 |
|        |       | T22413            | 0.0028 | 0.0009 | -1.6783 | 4.3368 |
|        |       | T22529            | 0.0022 | 0.0009 | -1.3680 | 5.7435 |
|        |       | T23053            | 0.0118 | 0.0050 | -1.2454 | 4.8808 |
|        |       | T25670            | 0.0028 | 0.0012 | -1.1666 | 4.3849 |
|        |       | T25842            | 0.0015 | 0.0004 | -1.7514 | 5.8948 |
|        |       | T26156            | 0.0016 | 0.0007 | -1.2591 | 4.8873 |
|        |       | T26696            | 0.0021 | 0.0007 | -1.6634 | 5.0180 |
|        |       | T32019            | 0.0075 | 0.0027 | -1.4590 | 6.4673 |
|        |       | T33712            | 0.0007 | 0.0002 | -1.6269 | 5.1489 |
|        |       | T33716            | 0.0412 | 0.0122 | -1.7533 | 4.9060 |
|        |       | T33859            | 0.0250 | 0.0093 | -1.4212 | 5.8358 |
|        |       | T33951            | 0.0013 | 0.0005 | -1.3961 | 4.6350 |
|        |       | T34099            | 0.1037 | 0.0375 | -1.4690 | 5.7238 |
|        |       | T34360            | 0.0116 | 0.0022 | -2.4173 | 4.6374 |
|        |       | T34450            | 0.0417 | 0.0087 | -2.2634 | 5.2159 |
|        |       | T34490            | 0.0019 | 0.0004 | -2.3555 | 4.6260 |
|        |       | Y25028            | 0.0025 | 0.0007 | -1.8175 | 4.6532 |
|        |       | Y34089            | 0.0070 | 0.0025 | -1.4793 | 5.4296 |

|        |                                            |       |         |         |         |        |
|--------|--------------------------------------------|-------|---------|---------|---------|--------|
| E9Q0S6 | Protein Tns1                               | S1054 | 0.0584  | 0.0257  | -1.1849 | 6.1923 |
|        |                                            | S1451 | 0.6317  | 0.3440  | -0.8770 | 5.8587 |
| E9Q616 | Protein Ahnak                              | S116  | 0.0055  | 0.0009  | -2.5900 | 6.8365 |
|        |                                            | S136  | 0.1190  | 0.0676  | -0.8166 | 6.2106 |
| G3X9L6 | MCG55033                                   | S44   | 0.0001  | 0.0005  | 1.6488  | 4.9756 |
| O08715 | A-kinase anchor protein 1 mitochondrial    | S546  | 1.0082  | 0.3587  | -1.4908 | 5.1226 |
|        |                                            | S55   | 39.4215 | 19.2740 | -1.0323 | 9.5664 |
| O54724 | Polymerase I and transcript release factor | S20   | 0.0738  | 0.0577  | -0.3548 | 4.8786 |
| O70251 | Elongation factor 1-beta                   | S106  | 3.9982  | 0.9844  | -2.0221 | 4.7138 |
| O88990 | Alpha-actinin-3                            | S147  | 0.0074  | 0.0059  | -0.3268 | 5.4884 |
| P08249 | Malate dehydrogenase mitochondrial         | T235  | 0.0009  | 0.0002  | -1.9440 | 4.3772 |
| P11531 | Dystrophin                                 | S1770 | 0.0333  | 0.0125  | -1.4128 | 5.6028 |
|        |                                            | S2070 | 0.0540  | 0.0051  | -3.4105 | 8.2522 |
| P13542 | Myosin-8                                   | S1206 | 3.0980  | 0.6637  | -2.2227 | 4.7000 |
|        |                                            | S1342 | 4.9305  | 1.0057  | -2.2935 | 5.5599 |
|        |                                            | T1188 | 9.1947  | 1.6444  | -2.4833 | 4.5755 |
| P15508 | Spectrin beta chain erythrocytic           | T2072 | 1.0051  | 1.2893  | 0.3593  | 7.5462 |
| P23242 | Gap junction alpha-1 protein               | S273  | 0.1593  | 0.9434  | 2.5660  | 5.5193 |
|        |                                            | S325  | 0.7484  | 0.5628  | -0.4114 | 5.8472 |
| P27546 | Microtubule-associated protein 4           | S610  | 0.3949  | 0.2289  | -0.7871 | 6.3288 |

|        |                                                                              |       |         |        |         |        |
|--------|------------------------------------------------------------------------------|-------|---------|--------|---------|--------|
| P35486 | Pyruvate dehydrogenase E1 component subunit alpha somatic form mitochondrial | S300  | 0.0162  | 0.0122 | -0.4121 | 4.4200 |
| P50462 | Cysteine and glycine-rich protein 3                                          | S95   | 0.0021  | 0.0012 | -0.7426 | 6.3354 |
| P51667 | Myosin regulatory light chain 2 ventricular/cardiac muscle isoform           | S14   | 0.0108  | 0.0184 | 1.4707  | 4.5494 |
| P53986 | Monocarboxylate transporter 1                                                | S213  | 0.0278  | 0.0063 | -2.1419 | 4.5758 |
| P58771 | Tropomyosin alpha-1 chain                                                    | S87   | 0.0003  | 0.0002 | -0.2789 | 4.8352 |
| P59017 | Bcl-2-like protein 13                                                        | S343  | 4.4476  | 3.4242 | -0.3772 | 4.6244 |
| P70670 | Nascent polypeptide-associated complex subunit alpha muscle-specific form    | S1364 | 0.0012  | 0.0031 | 1.3774  | 4.8381 |
|        |                                                                              | S2138 | 2.2540  | 1.5795 | -0.5130 | 6.8084 |
|        |                                                                              | S494  | 0.0471  | 0.0655 | 0.4754  | 9.7262 |
|        |                                                                              | T2129 | 0.0735  | 0.0233 | -1.6556 | 9.0701 |
|        |                                                                              | T946  | 0.0270  | 0.1974 | 2.8713  | 7.1190 |
| P97855 | Ras GTPase-activating protein-binding protein 1                              | S149  | 15.9179 | 5.5490 | -1.5203 | 4.3308 |
| Q02257 | Junction plakoglobin                                                         | S665  | 0.0158  | 0.0099 | -0.6769 | 8.1032 |
| Q02566 | Myosin-6                                                                     | S1362 | 0.0002  | 0.0003 | 0.5367  | 4.5129 |
|        |                                                                              | S1465 | 0.0002  | 0.0001 | -0.9855 | 5.0253 |

|        |                                               |              |         |        |         |        |
|--------|-----------------------------------------------|--------------|---------|--------|---------|--------|
|        |                                               | S1469        | 0.0000  | 0.0000 | -2.4819 | 5.2167 |
|        |                                               | S1600        | 0.0004  | 0.0005 | 0.4379  | 4.8373 |
|        |                                               | S1922        | 0.0024  | 0.0008 | -1.5925 | 5.0694 |
|        |                                               | S205         | 0.0000  | 0.0000 | 0.2175  | 4.3235 |
|        |                                               | T662         | 0.0002  | 0.0001 | -0.9554 | 5.2232 |
|        |                                               | Y1382        | 0.0002  | 0.0001 | -1.3242 | 4.4201 |
| Q03265 | ATP synthase subunit alpha mitochondrial      | S521         | 0.0009  | 0.0008 | -0.1954 | 6.1092 |
|        |                                               | T64          | 0.0001  | 0.0000 | -1.8215 | 4.5288 |
| Q14BI5 | Myomesin 2                                    | S78          | 0.0074  | 0.0263 | 1.8294  | 5.9235 |
| Q3UHZ5 | Leiomodrin-2                                  | S15          | 0.5259  | 0.2796 | -0.9114 | 5.3197 |
|        |                                               | S423         | 3.8246  | 0.6288 | -2.6046 | 4.6946 |
|        |                                               | S59          | 0.5681  | 0.2829 | -1.0059 | 4.3662 |
| Q3UTJ2 | Sorbin and SH3 domain-containing protein 2    | S1097        | 0.2737  | 0.1449 | -0.9177 | 7.0154 |
|        |                                               | S32433       | 0.0233  | 0.0088 | -1.4020 | 7.3101 |
|        |                                               | S328         | 0.0048  | 0.0037 | -0.3879 | 6.1920 |
|        |                                               | S382         | 1.8724  | 1.5259 | -0.2952 | 4.9972 |
| Q4U4S6 | Xin actin-binding repeat-containing protein 2 | S1576        | 16.0632 | 4.5636 | -1.8155 | 4.7302 |
|        |                                               | T2910        | 0.2633  | 0.0189 | -3.7974 | 7.0974 |
| Q62234 | Myomesin-1                                    | S857, S867   | 0.0295  | 0.0148 | -0.9922 | 5.1552 |
|        |                                               | S2127, S2137 | 0.0282  | 0.0124 | -1.1906 | 4.3272 |

|        |                                                          |       |        |        |         |         |
|--------|----------------------------------------------------------|-------|--------|--------|---------|---------|
| Q62407 | Striated muscle-specific serine/threonine-protein kinase | S2019 | 0.7227 | 0.1802 | -2.0040 | 4.6616  |
|        |                                                          | S2396 | 0.8762 | 0.3110 | -1.4944 | 6.2763  |
|        |                                                          | S511  | 1.2698 | 0.5888 | -1.1087 | 4.7248  |
|        |                                                          | S511  | 0.1402 | 0.0336 | -2.0599 | 12.4438 |
|        |                                                          | T1701 | 0.5907 | 0.2842 | -1.0554 | 7.0415  |
| Q62417 | Sorbin and SH3 domain-containing protein 1               | S397  | 0.2880 | 0.6779 | 1.2352  | 6.8945  |
| Q63918 | Serum deprivation-response protein                       | S204  | 0.3621 | 0.1396 | -1.3752 | 9.8672  |
|        |                                                          | S359  | 0.4695 | 1.4052 | 1.5815  | 4.6333  |
| Q6P8J7 | Creatine kinase S-type mitochondrial                     | T151  | 0.0024 | 0.0018 | -0.4202 | 5.6519  |
| Q70KF4 | Cardiomyopathy-associated protein 5                      | S1458 | 0.6693 | 0.1177 | -2.5069 | 4.7364  |
|        |                                                          | S155  | 0.1240 | 0.0335 | -1.8894 | 4.4325  |
|        |                                                          | S158  | 0.2707 | 0.1187 | -1.1890 | 5.0162  |
| Q78IK4 | MICOS complex subunit Mic27                              | S253  | 0.0129 | 0.0694 | 2.4276  | 4.6409  |
| Q7TPW1 | Nexilin                                                  | S299  | 0.0519 | 0.0085 | -2.6190 | 4.6854  |
|        |                                                          | S96   | 0.0682 | 0.0208 | -1.7097 | 6.1825  |
| Q8BG95 | Protein phosphatase 1 regulatory subunit 12B             | S502  | 0.0754 | 0.0087 | -3.1098 | 5.3858  |
|        |                                                          | S729  | 1.0089 | 0.7794 | -0.3814 | 6.3575  |

|        |                                                           |            |         |         |         |        |
|--------|-----------------------------------------------------------|------------|---------|---------|---------|--------|
| Q8BMS1 | Trifunctional enzyme subunit alpha mitochondrial          | T316       | 0.0013  | 0.0009  | -0.5822 | 6.0033 |
| Q8BWB1 | Synaptopodin 2-like protein                               | S175       | 5.2623  | 4.7648  | -0.1433 | 4.6354 |
|        |                                                           | T344       | 0.4644  | 0.5580  | 0.2650  | 4.9074 |
| Q8CAQ8 | MICOS complex subunit Mic60                               | S446       | 0.0036  | 0.0013  | -1.4743 | 5.9090 |
|        |                                                           | Y33        | 0.0045  | 0.0008  | -2.5840 | 6.5576 |
| Q8CC35 | Synaptopodin                                              | S512       | 6.5720  | 7.1959  | 0.1308  | 6.6120 |
|        |                                                           | S831       | 0.3623  | 0.5722  | 0.6593  | 5.8528 |
|        |                                                           | S833       | 0.2805  | 0.4870  | 0.7959  | 6.5303 |
| Q8K4G5 | Actin-binding LIM protein 1                               | S475, S479 | 0.0032  | 0.7176  | 7.7880  | 5.3990 |
|        |                                                           | S752       | 1.1747  | 0.8391  | -0.4853 | 4.6471 |
| Q8VCF0 | Mitochondrial antiviral-signaling protein                 | S152       | 2.4500  | 9.4202  | 1.9430  | 6.4528 |
|        |                                                           | S220       | 55.4740 | 32.0061 | -0.7935 | 4.3761 |
| Q91Z83 | Myosin-7                                                  | S1137      | 0.0079  | 0.0022  | -1.8695 | 4.3341 |
|        |                                                           | S1362      | 0.0002  | 0.0020  | 3.3096  | 4.6271 |
|        |                                                           | S1465      | 0.0036  | 0.0005  | -2.8680 | 4.8571 |
|        |                                                           | S1469      | 0.0007  | 0.0001  | -2.8017 | 6.1582 |
|        |                                                           | S1922      | 0.0349  | 0.0094  | -1.8898 | 6.2882 |
|        |                                                           | Y1382      | 0.0026  | 0.0008  | -1.6190 | 5.9383 |
| Q99JB8 | Protein kinase C and casein kinase II substrate protein 3 | T335       | 2.7721  | 1.6031  | -0.7902 | 5.8995 |
| Q9CQ73 | Plakophilin 2                                             | S126       | 0.1452  | 0.0881  | -0.7199 | 4.5166 |

|        |                                                                     |            |         |         |         |        |
|--------|---------------------------------------------------------------------|------------|---------|---------|---------|--------|
|        |                                                                     | S207       | 0.1065  | 0.1543  | 0.5347  | 4.6197 |
| Q9CR62 | Mitochondrial 2-oxoglutarate/malate carrier protein                 | Y102       | 0.0004  | 0.0012  | 1.7507  | 4.5292 |
| Q9CY58 | Plasminogen activator inhibitor 1 RNA-binding protein               | S329       | 7.8868  | 3.6106  | -0.8484 | 5.1380 |
|        |                                                                     | S329       | 15.0249 | 6.7037  | -1.1643 | 5.2753 |
|        |                                                                     | Y244       | 0.6315  | 0.3991  | -0.6622 | 5.1253 |
| Q9D5T0 | ATPase family AAA domain-containing protein 1                       | S322       | 1.5285  | 1.2449  | -0.2998 | 4.9283 |
| Q9D6Z1 | Nucleolar protein 56                                                | S543       | 0.5552  | 1.1323  | 1.0282  | 6.2902 |
| Q9DC70 | NADH dehydrogenase [ubiquinone] iron-sulfur protein 7 mitochondrial | S41        | 0.0188  | 0.0157  | -0.2631 | 4.3663 |
| Q9ET54 | Palladin                                                            | T642       | 0.4029  | 0.7533  | 0.9026  | 4.8468 |
| Q9ET78 | Junctophilin-2                                                      | S593, S597 | 19.9814 | 11.0532 | -0.8542 | 6.1349 |
|        |                                                                     | S101, S116 | 0.4846  | 0.2903  | -0.7396 | 6.3980 |
| Q9JKS4 | LIM domain-binding protein 3                                        | S156       | 0.0016  | 0.0042  | 1.3915  | 6.7734 |
|        |                                                                     | T119       | 0.0024  | 0.0029  | 0.2771  | 5.6162 |
| Q9Z0X1 | Apoptosis-inducing factor 1 mitochondrial                           | S370       | 0.0036  | 0.0027  | -0.4396 | 4.9222 |
